# Supplementary material for: What controls the isotopic composition of Greenland surface snow?
Source: Copernicus journal article supplement (doi:10.5194/cp-10-377-2014), 2014-02-20
Supplement: Supplementary file 1 [file cp-10-377-2014-supplement.pdf]

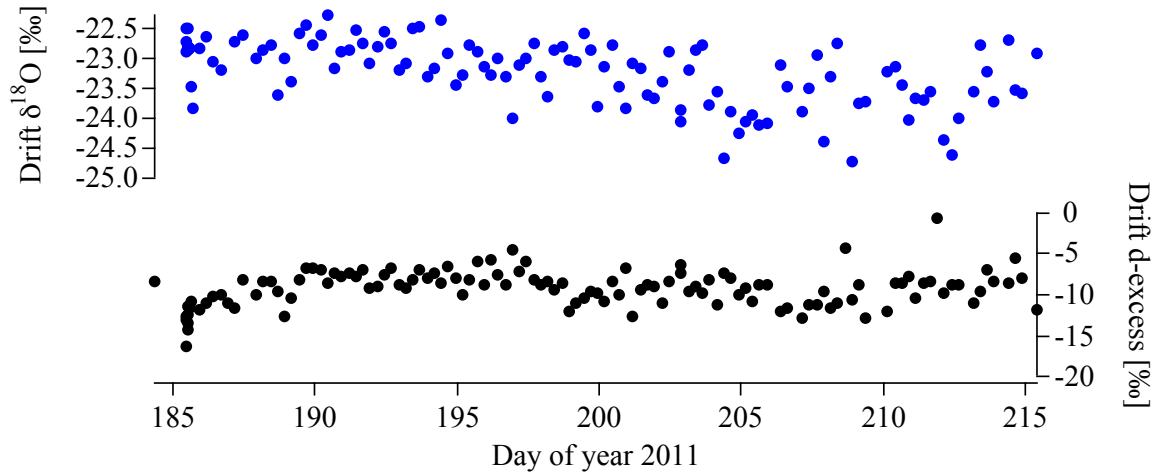

Figure S1: Measurement of known standard used to correct for the drift of the system in 2011.

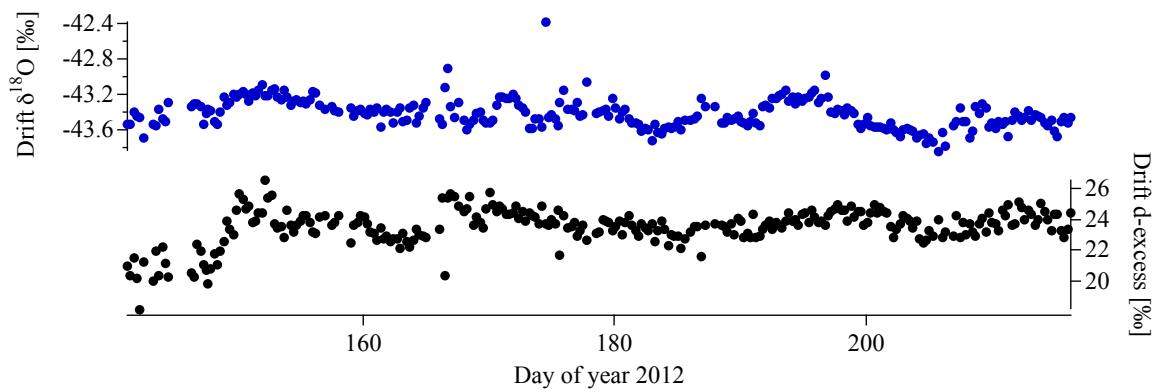

Figure S2: Measurement of known standard used to correct for the drift of the system in 2012.

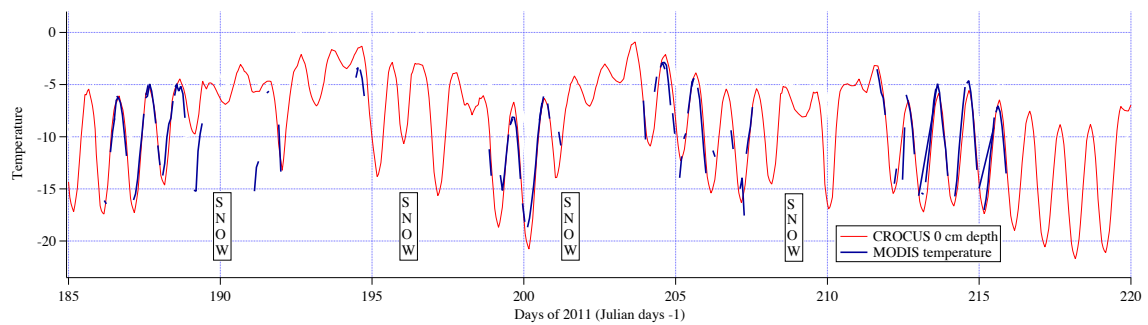

Figure S3: Direct comparison between snow surface skin temperatures obtained from CROCUS and skin temperatures obtained from MODIS MOD11\_L2 from TERRA and MYD11\_L2 from AQUA.
